# Supplementary material
Source: PubMed Central journal article supplement (PMC11232031)
Supplement: NIHMS2002336-supplement-1.pdf [file NIHMS2002336-supplement-1.pdf]

TABLE E1. Grade 1 and 2 anastomotic leaks

|                                   | <u>Total</u><br>n = 246    | <u>MIE</u><br>n = 181 | <u>RAMIE</u><br>n = 65 | <i>P</i> value |
|-----------------------------------|----------------------------|-----------------------|------------------------|----------------|
| Variables                         | n (%) or median (p25, p75) |                       |                        |                |
| Anastomotic leak (grade $\leq$ 2) | 29 (11.8)                  | 23 (12.7)             | 6 (9.2)                | .14            |

There was no difference in incidence of anastomotic leaks between the 2 operative approaches. *MIE*, Minimally invasive esophagectomy; *RAMIE*, Robotic-Assisted Minimally Invasive Esophagectomy.
